# Supplementary material
Source: PubMed Central journal article supplement (PMC4282577)
Supplement: embj0033-2704-sd2.pdf [file embj0033-2704-sd2.pdf]

### **Supplementary figure legends:**

Figure S1, Related to Figure 1. **Mitotic defects caused by I3 depletion.**

(A) Rescue of chromosome alignment by siRNA resistant GFP-I3. Stable inducible GFP-I3 HeLa cells were treated with indicated siRNAs and expression of GFP-I3 (resist) induced by doxycycline. Representative confocal images showing merges of DAPI and GFP channels. Quantification as in Fig. 1 B. Error bars indicate s.d. of 3 independent experiments with 50 cells per condition. Efficiency of siRNA-mediated depletion is shown by Western blot. HSC70 was probed as loading control. The asterisk denotes a non-specific band. Scale bar, 5  $\mu\text{m}$ .

(B) SDS22 or I3 depletion causes delay of anaphase onset. The timing between nuclear envelope breakdown (NEBD) and anaphase onset (AO) was determined in live cells expressing H2B-RFP and IBB-GFP after treatment with indicated siRNAs. NEBD was monitored as a nuclear efflux of IBB-GFP and AO was monitored as the start of separation of the sister chromatids using H2B-RFP. Stills from representative time lapse movies. Scale bar, 10  $\mu\text{m}$ .

Figure S2, Related to Figure 4. **I3 localization during mitosis.**

Cells stably expressing GFP-I3 were fixed and stained with DAPI. Representative images. Scale bar, 10  $\mu\text{m}$ .

Figure S3, Related to Figure 4. **Restoration of SDS22 localization by overexpression of siRNA resistant I3.**

(A) I3- or control-depleted stable SDS22-GFP cells were transiently transfected with mCherry or a mCherry-fusion of I3 resistant to I3 siRNA, fixed, and DAPI stained. Representative confocal images. Scale bar, 10  $\mu\text{m}$ .

(B) Percentage of metaphase cells with detectable SDS22 localization at kinetochores was quantified. Error bars indicate s.d. of 3 independent experiments with 20 cells per condition. P-value \*\*\*,  $p < 0.001$ .

(C) Western blot control of I3 expression levels with specific antibodies. Asterisks denote unspecific bands.

Figure S4, Related to Figure 5. **SDS22 localization to the outer kinetochore.**

SDS22 localizes to the outer kinetochore upon I3 depletion. SDS22-GFP cells were treated with indicated siRNAs, fixed and stained with CREST serum. Representative confocal images. Scale bar, 10  $\mu$ m.

Figure S5, Related to Figure 5. **PP1 $\gamma$  localization to kinetochores depends on KNL1.**

(A) Stable GFP-PP1 $\gamma$  cells were treated with KNL1 or control siRNA, fixed and DAPI-stained. Representative confocal images. Scale bar, 10  $\mu$ m.

(B) Percentage of metaphase cells with detectable PP1 $\gamma$  localization at kinetochores was quantified. Error bars indicate s.d. of 3 independent experiments with 25 cells per condition. P-value, \*\*\*,  $p < 0.001$ .

Figure S6, Related to Figure 6. **Partial rescue of the effect of I3 depletion by reduction of SDS22 expression.**

(A) Increased Aurora B autophosphorylation upon I3 depletion is partially reversed by attenuated SDS22 expression. Cells were treated with the first siRNA (siLuc or siI3) for 48h and a second (siLuc or siSDS22) for 24 h as indicated. Cells were fixed and stained with Aurora B-specific (AurB), phospho-T232 (phospho-AurB) antibodies and DAPI. Representative images. Scale bar, 10  $\mu$ m.

(B) Quantification of the ratio of phospho-AurB versus total AurB signal intensity on chromatin in (A). Box blots show median, lower and upper quartiles (line and box), 10<sup>th</sup> and 90<sup>th</sup> percentiles (whiskers) and outliers (●). P-value, \*\*\*,  $p < 0.001$ . Data from 3 independent experiments with a total of 60 cells per condition.

Figure S7, Related to Figure 6. **Effects of I3 overexpression on PP1 $\gamma$  localization and Aurora B pT232 levels.**

(A) I3 does not localize to kinetochores and displaces PP1 $\gamma$ . Stable GFP-PP1 $\gamma$  cells were transiently transfected with mCherry-fusions of I3 wild-type or NIPP1, fixed and DAPI stained. Representative confocal images. Scale bar, 10  $\mu$ m.

(B) Western blot control of expression levels with anti-dsRED antibodies.

**(C)** Western blot comparing the expression levels of transiently expressed PP1 subunits with the respective endogenous expression level by staining with anti-I3, anti-NIPP1, and anti-SDS22 antibodies as indicated. Asterisks denote non-specific bands.

**(D)** Overexpression of I3 increases Aurora B phosphorylation. Cells were transiently transfected with GFP or GFP-fusions of I3 wt, I3-(V41A/W43A), or NIPP1, fixed and stained with DAPI and Aurora B phospho-T232 specific antibodies. Note that overexpression of I3 wt and NIPP1, but not PP1-binding deficient I3-(V41A/W43A) increased Aurora B phosphorylation. Representative confocal images. Scale bar, 5  $\mu\text{m}$ .

**(E)** Quantification of (D). Box blots show median, lower and upper quartiles (line and box), 10<sup>th</sup> and 90<sup>th</sup> percentiles (whiskers) and outliers (●). Data from 3 independent experiments with 20 cells per condition. P-values, \*\*\*,  $p \leq 0.001$ .

**(F)** Western blot control of expression levels with anti-GFP antibodies.
