# Supplementary material
Source: PubMed Central journal article supplement (PMC4282577)

**A** GFP-I3 (resist) induction

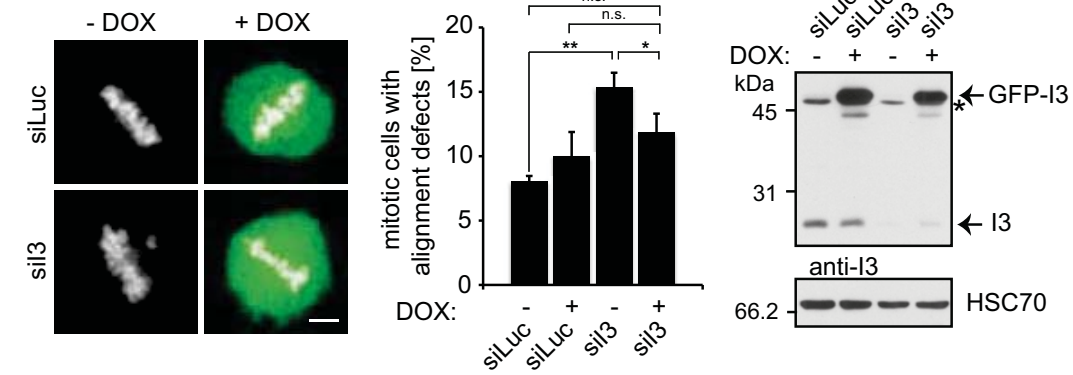

**B**

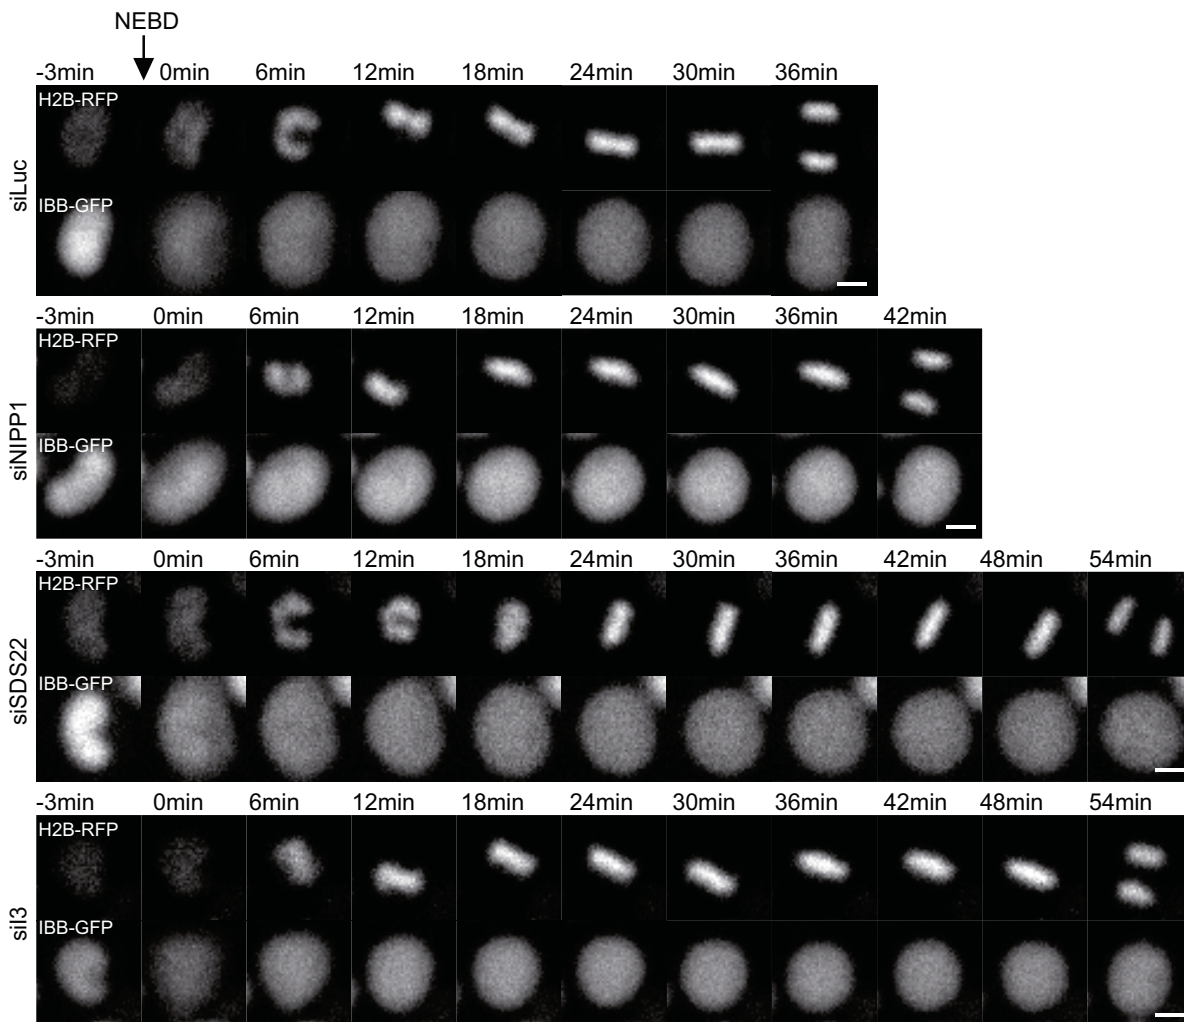

Figure S1

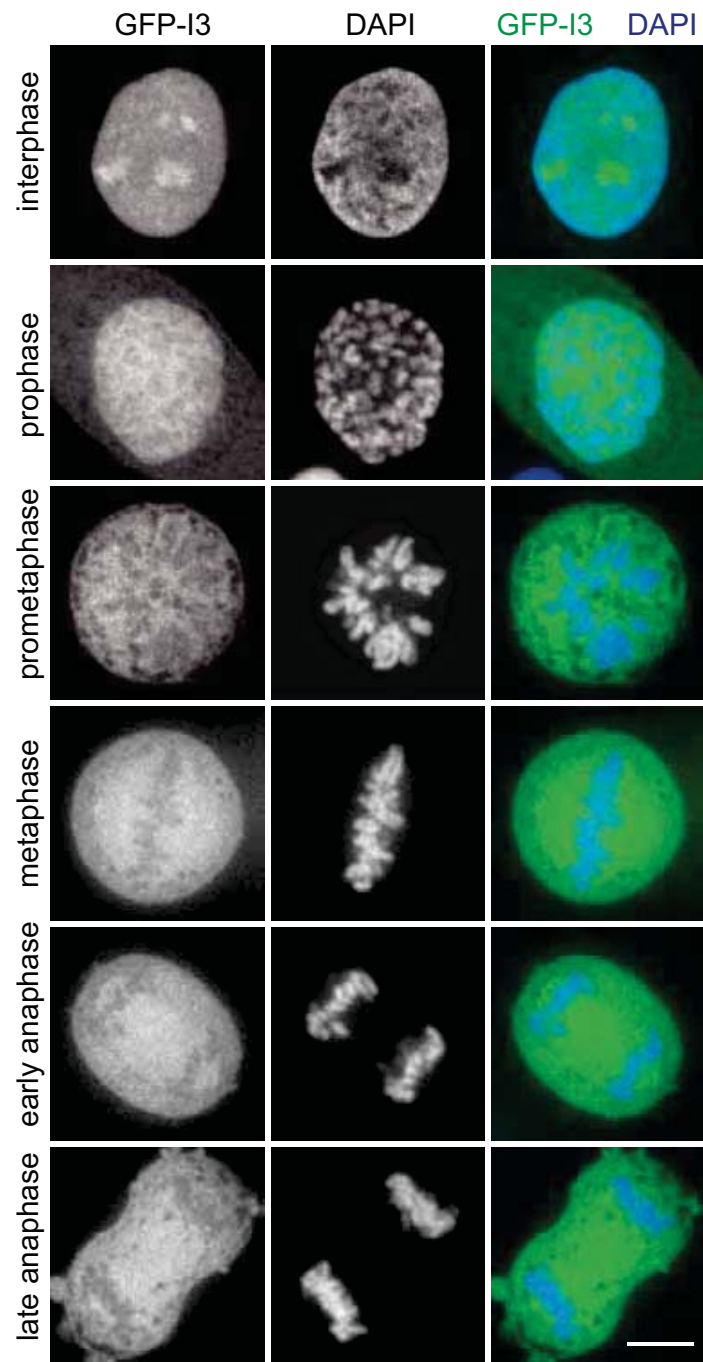

Figure S2

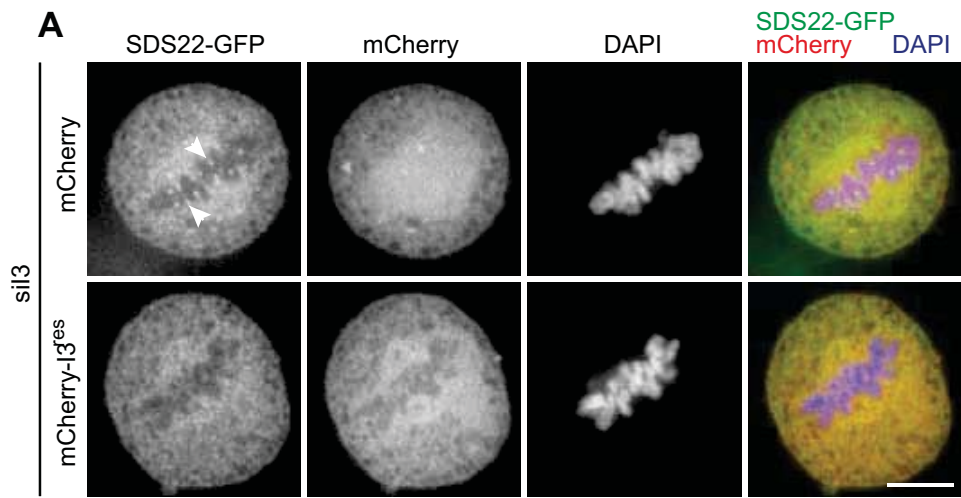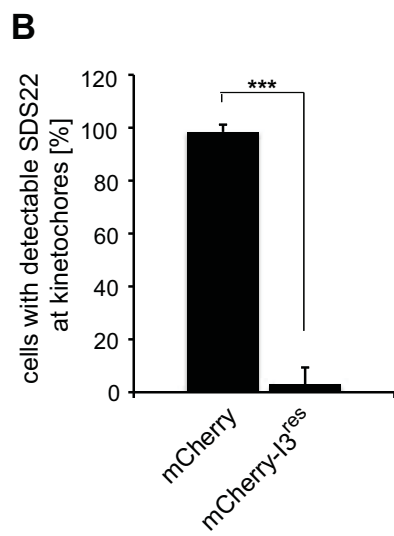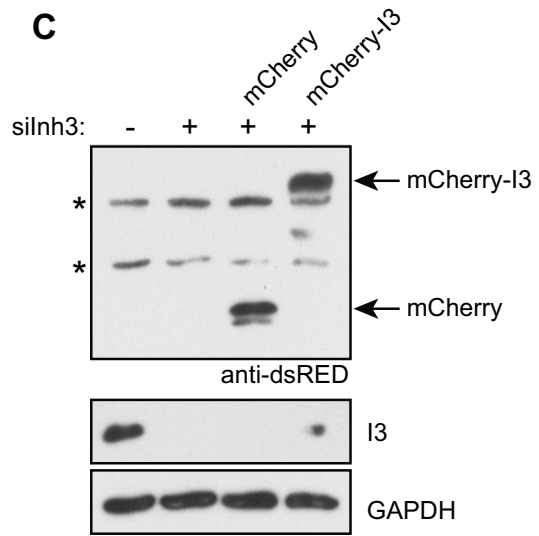

Figure S3

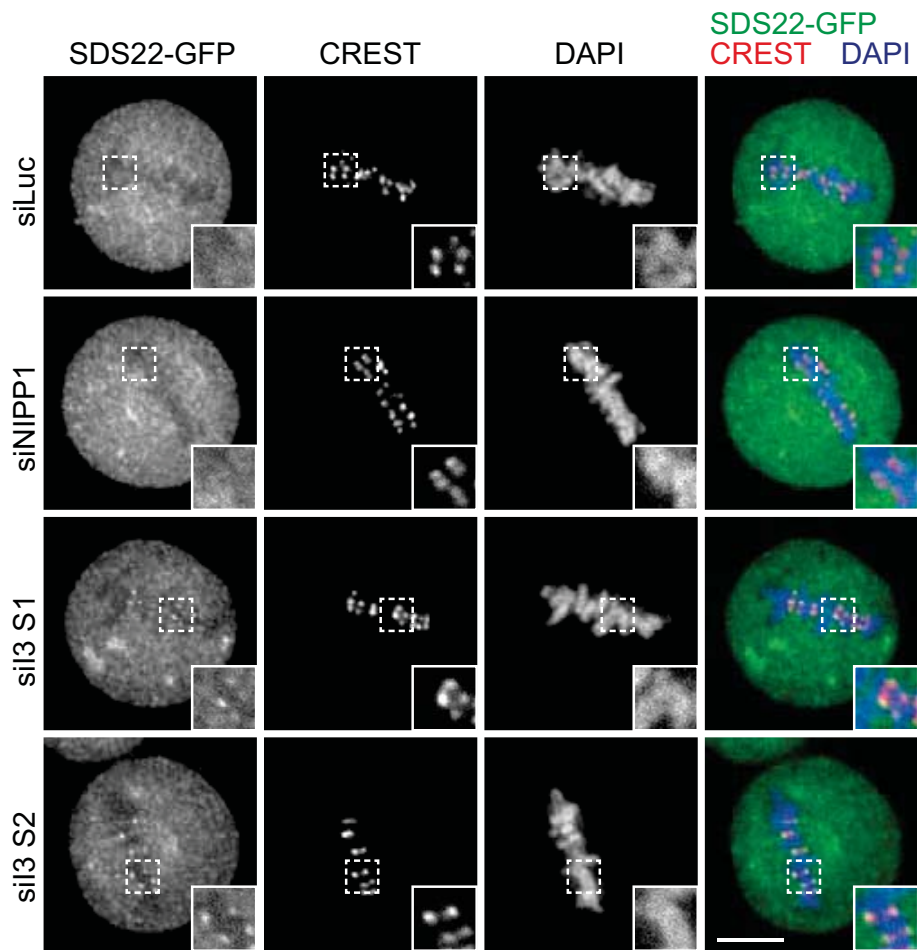

Figure S4

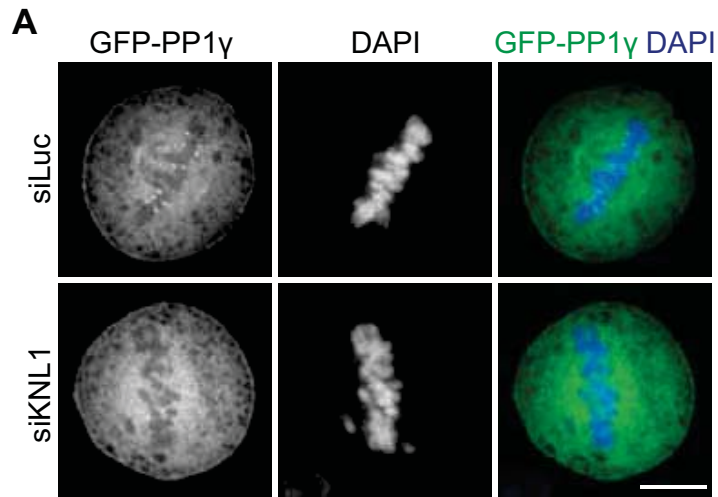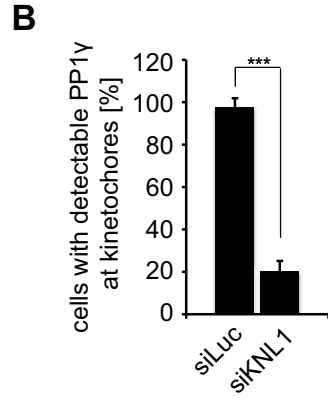

Figure S5

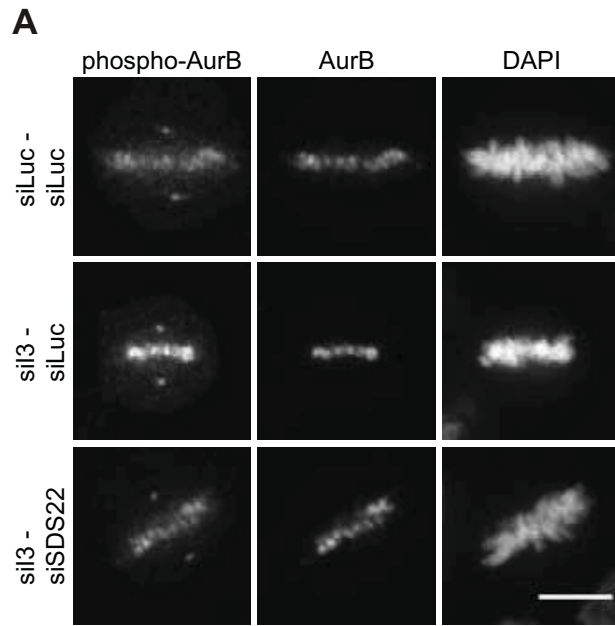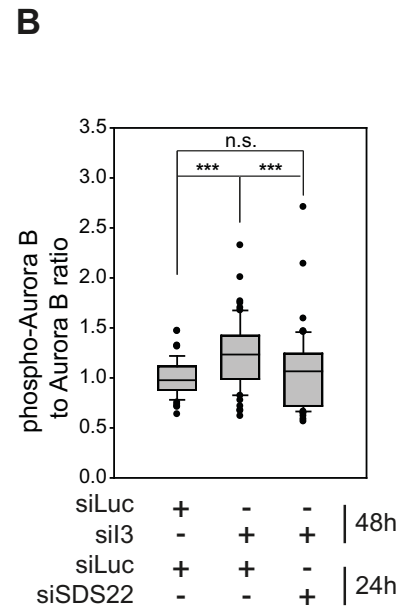

Figure S6

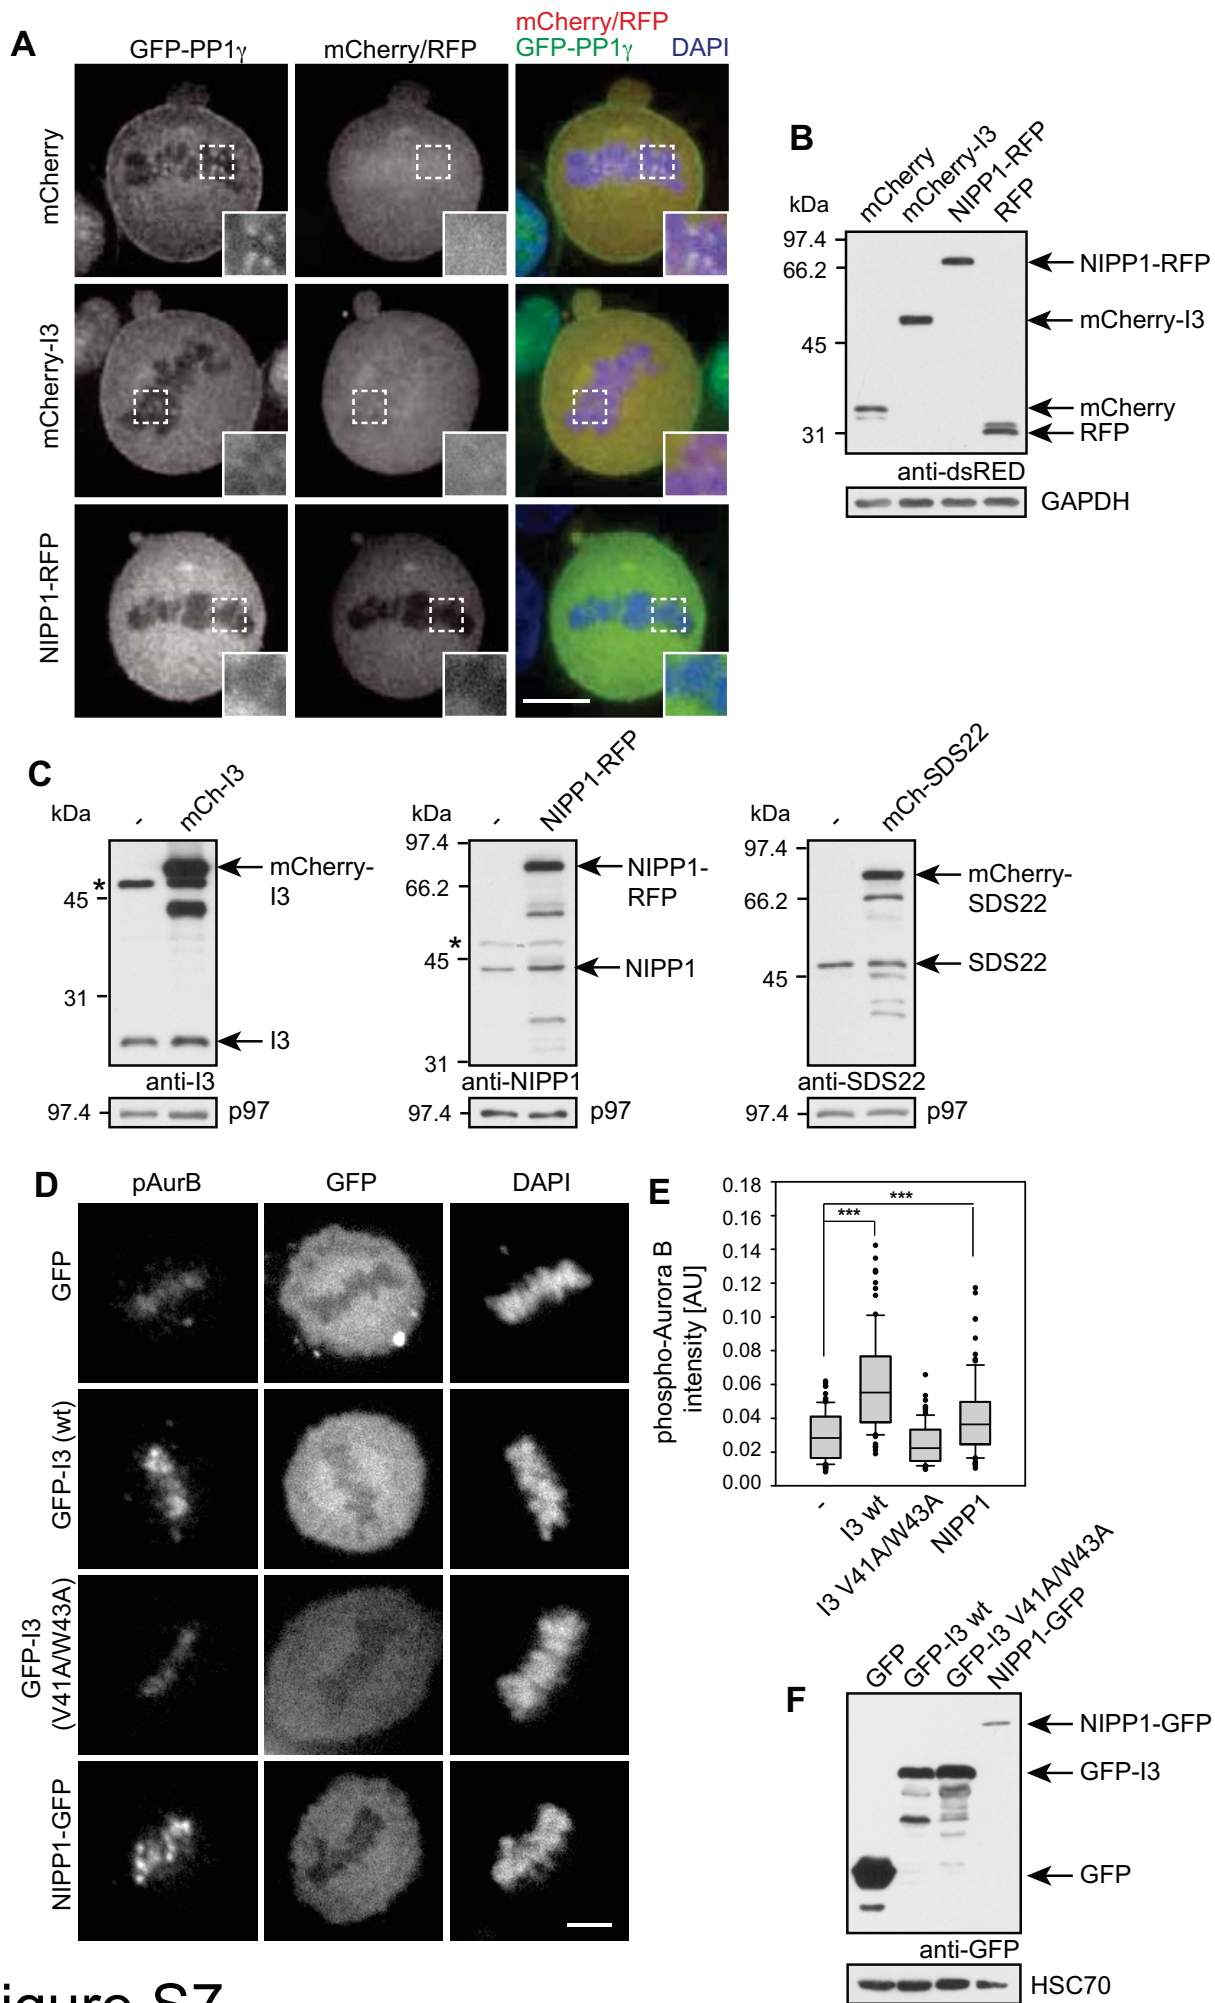

Figure S7

Supplement: embj0033-2704-sd1.pdf [file embj0033-2704-sd1.pdf]

**Figure S 1A**

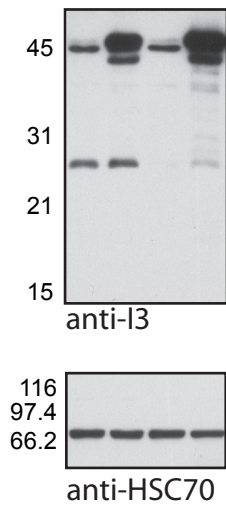

**Figure S 3C**

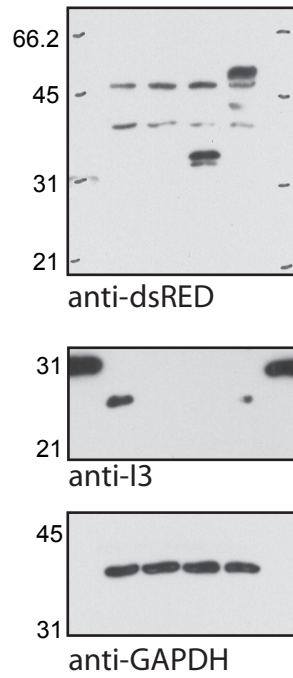

**Figure S 7B**

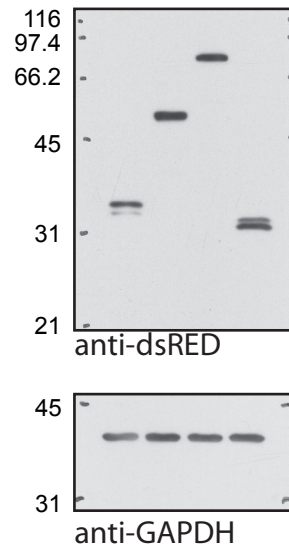

**Figure S 7C**

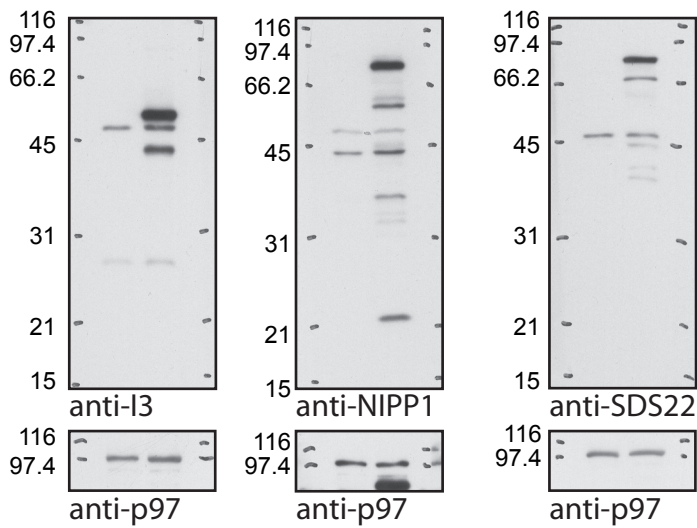

**Figure S 7F**

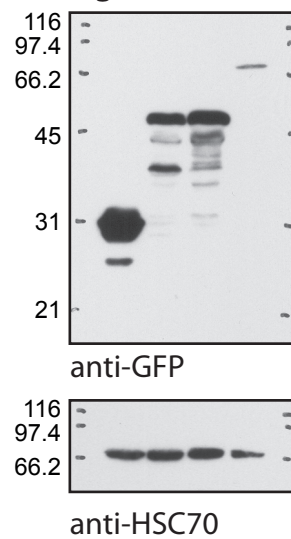

Supplement: embj0033-2704-sd3.pdf [file embj0033-2704-sd3.pdf]

**Figure 1A**

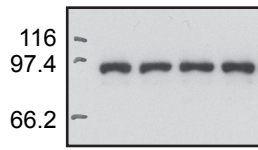

anti-p97

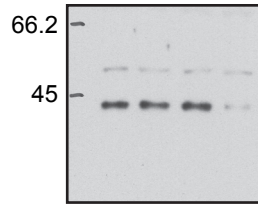

anti-NIPP1

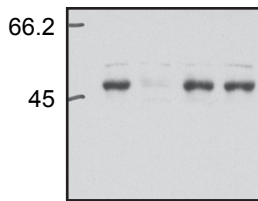

anti-SDS22

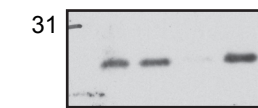

anti-I3

Supplement: embj0033-2704-sd5.pdf [file embj0033-2704-sd5.pdf]

**Figure 4B**

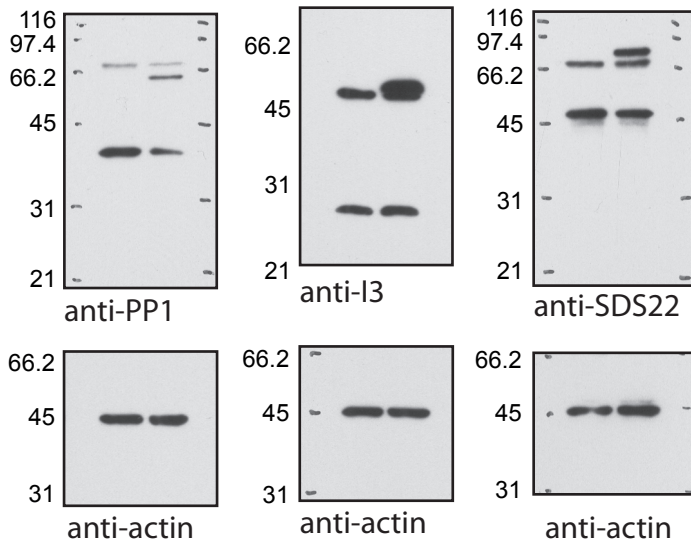

**Figure 4D**

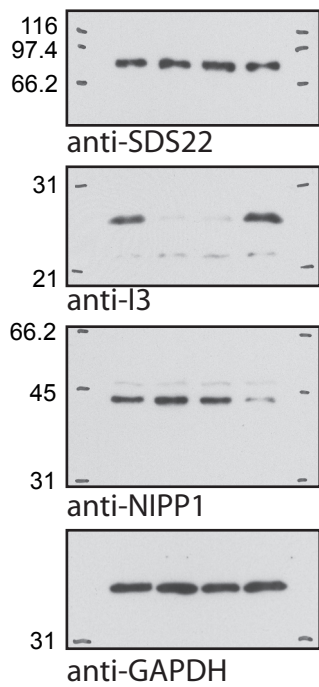

Supplement: embj0033-2704-sd6.pdf [file embj0033-2704-sd6.pdf]

**Figure 5C**

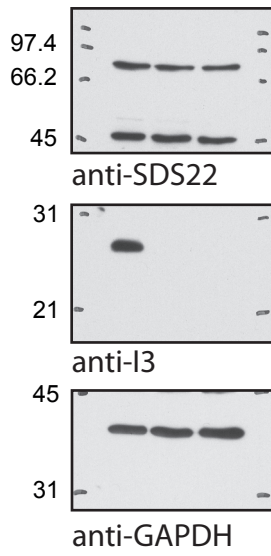

**Figure 5E**

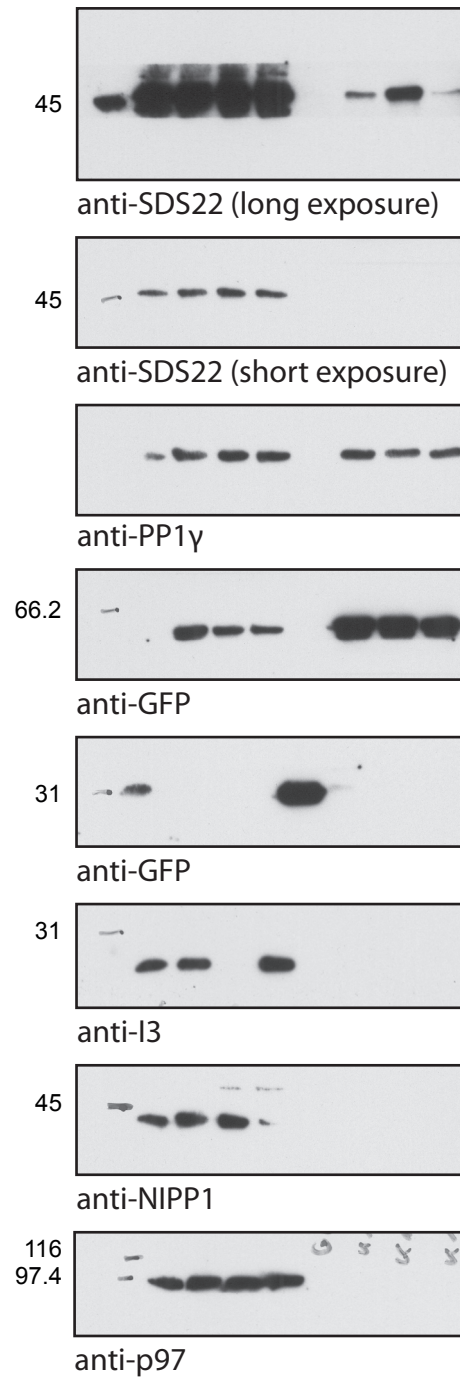

Supplement: embj0033-2704-sd7.pdf [file embj0033-2704-sd7.pdf]

**Figure 6B**

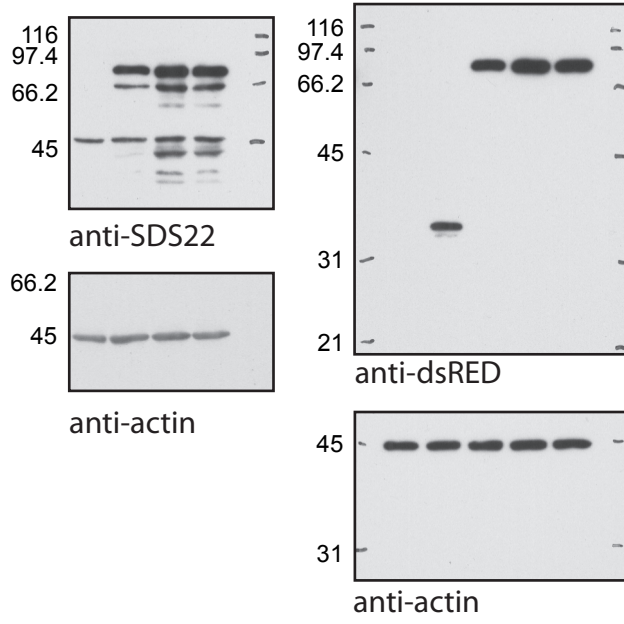

Supplement: embj0033-2704-sd8.pdf [file embj0033-2704-sd8.pdf]

**Figure 7A**

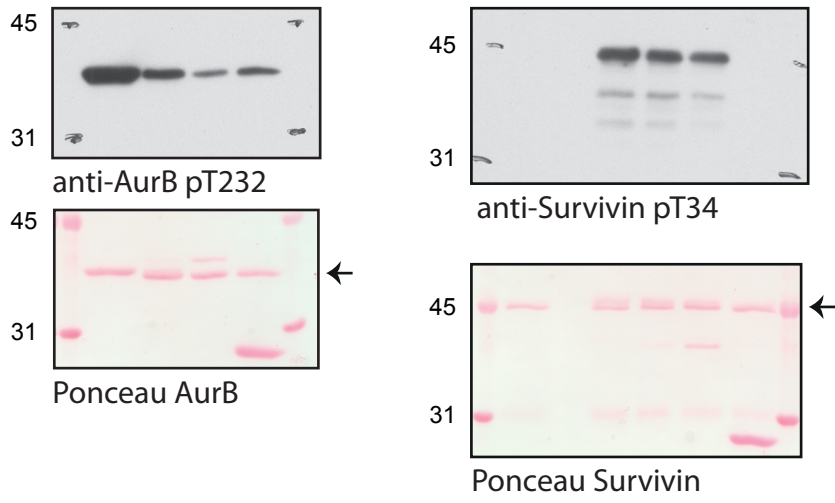

**Figure 7B**

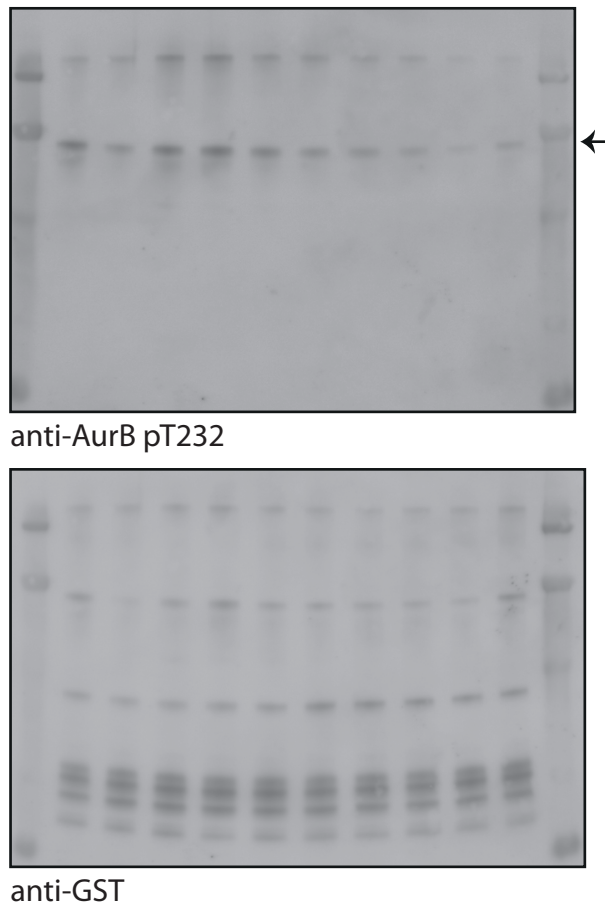

Supplement: embj0033-2704-sd9.pdf [file embj0033-2704-sd9.pdf]
